# Supplementary material for: Thiacalix[4]arene–potassium assemblies: a supramolecular architecture based on coordination polymers and a dimeric structure based on triangular pyramidal arrangements
Source: Royal Society of Chemistry journal article supplement (doi:10.1039/c0ce00824a), 2011-01-01
Supplement: c0ce00824a.pdf [file c0ce00824a.pdf]

**Thiacalix[4]arene–potassium assemblies:  
a supramolecular architecture based on coordination  
polymers and a dimeric structure based on triangular  
pyramidal arrangements**

**Manabu Yamada<sup>a</sup> and Fumio Hamada<sup>\*b</sup>**

*<sup>a</sup> Venture Business Laboratory, Akita University, Akita, 010-8502, Japan*

*<sup>b</sup> Department of Life Science, Faculty of Engineering and Resource Science, Akita University, Akita  
010-8502, Japan*

*\* Corresponding Author: hamada@ipc.akita-u.ac.jp; Fax: +81 18 837 0404. Tel: +81 18 889 2440.*

## **Supporting Information Comprises:**

### **Materials and Experimental Methods:**

1. General procedures and the synthesis of *p*-H-thiacalix[4]arene (1·4H).
2. Crystal structure determination of complexes **2** and **3**.

**Scheme S1** The thiacalixarene skeleton (A) and (B) diagrams in complex **2** showing the relevant atom labeling schemes.

**Scheme S2** The thiacalixarene skeleton diagram in complex **3** showing the relevant atom labeling scheme.

**Scheme S3** The thiacalixarene skeleton diagram of a quotation from Zeller and Radius' article showing the relevant atom labeling scheme.

**Table S1** Selected M-C distances and angles of alkali metal complexes of *p*-<sup>t</sup>Bu-thiacalix[4]arene and thiacalix[4]arene.

**Table S2** Crystal data and structure refinement for complexes **2** and **3**.

**Figure S1** Coordination environments of the potassium cations in complex **2**: (A) K $\cdots$ O coordination between the potassium cations and the thiacalixarene phenolic/phenoxide oxygen atoms, (B) K $\cdots$ S coordination between the potassium cations and the thiacalixarene sulfur linker atoms.

**Figure S2** Extended structure of complex **2** showing the supramolecular assembly by the inclusion the coordinated methanol molecules of the polymer into the thiacalixarene cavities of the adjacent polymer.

**Figure S3** Coordination environments of the potassium cations in the distorted triangular pyramidal arrangements of complex **3**: (A) K $\cdots$ O coordination between the potassium cations and the thiacalixarene phenolic/phenoxide oxygen atoms, (B) K $\cdots$ S coordination between the potassium cations and the thiacalixarene sulfur linker atoms.

**Figure S4** Extended structure of complex **3** showing the aggregation of the thiacalixarene aromatic rings and the solvated *n*-butanol molecules by intermolecular hydrophobic interactions.

**Figure S5** The ORTEP diagram of the asymmetric unit of complex **2** with thermal ellipsoids at 50% probability.

**Figure S6** The diagram of coordination environments in complex **2** showing the relevant atom labeling scheme.

**Figure S7** The ORTEP diagram of the asymmetric unit of complex **3** with thermal ellipsoids at 50% probability.

**Figure S8** The diagram of coordination environments in complex **3** showing the relevant atom labeling scheme.

## Experimental Section

### 1. General procedures and the synthesis of *p*-H-thiacalix[4]arene (1·4H)

All reactions were carried out in nitrogen atmosphere. Tetrahydrofuran (THF) was distilled from sodium / benzophenone under nitrogen and stored over 4 Å activated molecular sieves. Methanol and *n*-butanol were commercially available and used as recrystallization solvent without further purification. *p*-H-thiacalix[4]arene (1·4H) was obtained by de *tert*-butylation reaction of *p*-*t*Bu-thiacalix[4]arene<sup>S1</sup> which was prepared according to our previously reported procedures<sup>S2</sup>. IR spectra were recorded with a Perkin-Elmer SPECTRUM 2000 spectrophotometer. <sup>1</sup>H NMR spectra were taken on a Bruker DPX 300, and measured using CD<sub>3</sub>OD as a solvent, unless otherwise noted.

### 2. Crystal structure determination of complex 2 and 3

Single crystals of complexes **2** and **3** suitable for single-crystal X-ray diffraction studies were formed. The crystals containing mother liquid were drunk up with a pipette, which dropped in paraffin oil. Single crystals coated with the oil were picked up with on MicroMounts<sup>TM</sup>, and the crystals were placed immediately in a cold nitrogen stream at -100 or -153°C. X-ray diffraction data for complexes **2** and **3** were collected on a Rigaku PAXIS RAPID imaging plate diffractometer with a graphite monochromated Mo K $\alpha$  radiation ( $\lambda = 0.71075$  Å). Structures were solved by direct methods using SHELXS-97<sup>S3</sup> and refined by full-matrix least-squares on  $F^2$  using the SHELXL-97<sup>S4</sup> program.

## Supplementary References

- S1. (a) Higuchi, Y.; Narita, M.; Niimi, T.; Ogawa, N.; Hamada, F.; Kumagai, H.; Iki, N.; Miyano, S.; Kabuto, C. *Tetrahedron* **2000**, *56*, 4659-4666. (b) Kabuto, C.; Higuchi, Y.; Niimi, T.; Hamada, F.; Iki, N.; Morohashi, N.; Miyano, S. *J. Incl. Phenom. Macrocycl. Chem.* **2002**, *42*, 89-98. (c) Kasyan, O.; Swierczynski, D.; Drapailo, A.; Suwinska, K.; Lipkowski, J.; Kalchenko, V. *Tetrahedron Lett.* **2003**, *44*, 7167-7170.
- S2. (a) Kondo, Y.; Endo, K.; Iki, N.; Miyano, S.; Hamada, F. *J. Incl. Phenom. Macrocycl. Chem.* **2005**, *52*, 45-49. (b) Kondo, Y.; Hamada, F. *J. Incl. Phenom. Macrocycl. Chem.* **2007**, *58*, 123-126.
- S3. Sheldrick, G. M. *SHELXS-97 Program for solution of crystal structures*, University of Göttingen, Germany, 1997.
- S4. Sheldrick, G. M. *SHELXL-97 Program for refinement of crystal structures*, University of Göttingen, Germany, 1997.

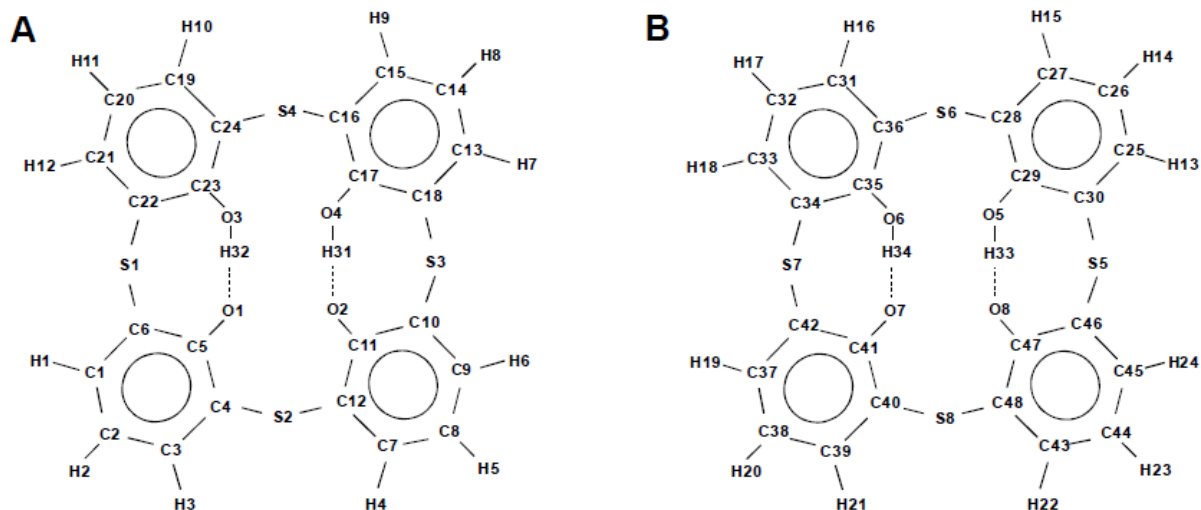

**Supplementary Scheme S1** The thiocalixarene skeleton (A) and (B) diagrams in complex **2** showing the relevant atom labeling schemes. The hydrogen bonding distances in the dimers: H(32)⋯O(1) 1.631 Å; H(31)⋯O(2) 1.636 Å; H(34)⋯O(7) 1.701 Å; H(33)⋯O(8) 1.656 Å (corresponding O⋯O distances: O(1)⋯O(4) 2.447 Å; O(2)⋯O(3) 2.455 Å; O(5)⋯O(8) 2.459 Å; O(6)⋯O(7) 2.455 Å).

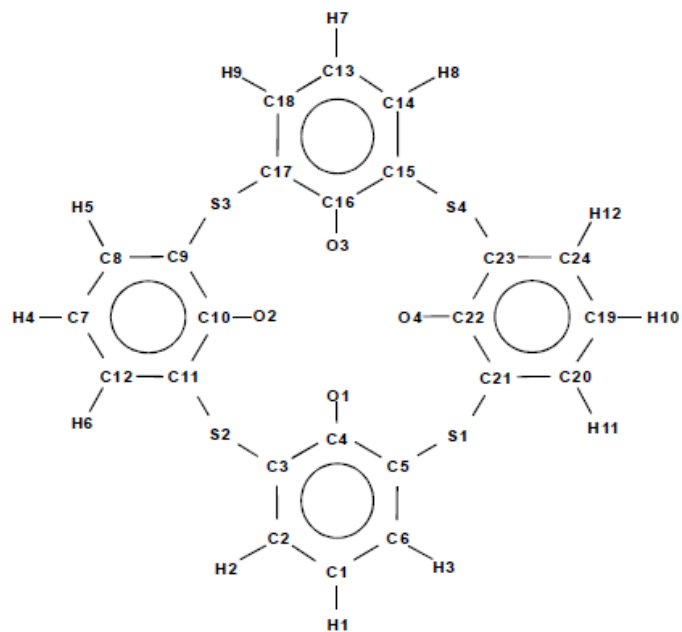

**Supplementary Scheme S2** The thiacalixarene skeleton diagram in complex **3** showing the relevant atom labeling scheme.

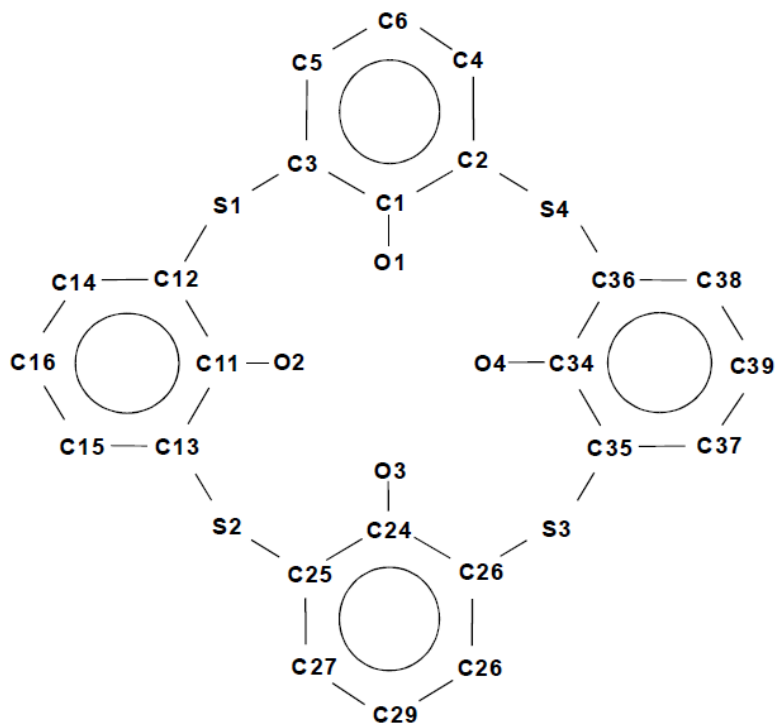

**Supplementary Scheme S3** The thiacalixarene skeleton diagram of a quotation from Zeller and Radius' article showing the relevant atom labeling scheme. Hydrogen atoms and 'Bu-groups have been omitted for clarity.



**Supplementary Table S1** Selected M-C distances and angles of alkali metal complexes of *p*-<sup>t</sup>Bu-thiacalix[4]arene and thiacalix[4]arene.

| Compound                             | M-ArC (Å)                |             | Selected angle(°)                                              |                                                                  | Ref.         |
|--------------------------------------|--------------------------|-------------|----------------------------------------------------------------|------------------------------------------------------------------|--------------|
|                                      | interior                 | exterior    | interior                                                       | exterior                                                         |              |
| <i>p</i> - <sup>t</sup> BuTC4A·Na·Py | 2.731-4.505              | 2.825-5.168 | O1-O3-C29: 96.97 <sup>b</sup><br>O3-O1-C6: 110.71 <sup>b</sup> | O2-O4-C39: 129.40 <sup>b</sup><br>O4-O2-C16: 132.67 <sup>b</sup> | S5           |
| <i>p</i> - <sup>t</sup> BuTC4A·K·Py  | 3.087-3.482 <sup>a</sup> | 3.009-5.123 | O1-O3-C29: 82.30 <sup>b</sup><br>O3-O1-C6: 87.42 <sup>b</sup>  | O2-O4-C42: 135.54 <sup>b</sup><br>O4-O2-C16: 138.31 <sup>b</sup> | S5           |
| Complex <b>3</b>                     | 3.039-3.295 <sup>a</sup> | 3.017-5.142 | O1-O3-C13: 84.06<br>O3-O1-C1: 83.67                            | O2-O4-C19: 135.62<br>O4-O2-C7: 138.14                            | <sup>c</sup> |

<sup>a</sup>  $\eta^6$  coordination distances for cation- $\pi$  interactions.

<sup>b</sup> The relevant atom labeling is carried a quotation from Zeller and Radius' article<sup>S5</sup>, and the relevant atom labeling scheme is shown in Scheme S3.

<sup>c</sup> This work.

### Supplementary Reference

S5. J. Zeller and U. Radius, *Inorg. Chem.*, 2006, **45**, 9487-9492.

**Supplementary Table S2** Crystal data and structure refinement for complexes **2** and **3**.

| Complex                                                       | <b>2</b>                                                                        | <b>3</b>                                                                      |
|---------------------------------------------------------------|---------------------------------------------------------------------------------|-------------------------------------------------------------------------------|
| Empirical formula                                             | C <sub>100</sub> H <sub>72</sub> O <sub>23</sub> S <sub>16</sub> K <sub>8</sub> | C <sub>72</sub> H <sub>84</sub> O <sub>14</sub> S <sub>8</sub> K <sub>8</sub> |
| Formula weight                                                | 2467.50                                                                         | 1742.71                                                                       |
| Temperature/K                                                 | 173.1                                                                           | 120.1                                                                         |
| Crystal system                                                | monoclinic                                                                      | monoclinic                                                                    |
| Space group                                                   | Cc                                                                              | P2 <sub>1</sub> /n                                                            |
| <i>a</i> / Å                                                  | 22.2021(10)                                                                     | 12.7148(6)                                                                    |
| <i>b</i> / Å                                                  | 19.4371(9)                                                                      | 13.1573(5)                                                                    |
| <i>c</i> / Å                                                  | 15.8554(6)                                                                      | 23.5690(12)                                                                   |
| $\beta$ / °                                                   | 130.5960(9)                                                                     | 98.1440(17)                                                                   |
| <i>V</i> / Å <sup>3</sup>                                     | 5195.5(4)                                                                       | 3903.2(3)                                                                     |
| <i>Z</i>                                                      | 2                                                                               | 2                                                                             |
| <i>D</i> <sub>calcd</sub> / g cm <sup>-3</sup>                | 1.577                                                                           | 1.483                                                                         |
| $\mu$ / mm <sup>-1</sup>                                      | 0.726                                                                           | 0.717                                                                         |
| <i>F</i> (000)                                                | 2528                                                                            | 1816                                                                          |
| Reflection collected                                          | 24329                                                                           | 37384                                                                         |
| Independent reflections ( <i>R</i> <sub>int</sub> )           | 11157 (0.0375)                                                                  | 8930 (0.040)                                                                  |
| Data / parameters                                             | 11157 / 665                                                                     | 8930 / 455                                                                    |
| Goodness-of-fit                                               | 1.379                                                                           | 1.047                                                                         |
| <i>R</i> and <i>wR</i> for <i>I</i> > 2 $\sigma$ ( <i>I</i> ) | 0.0552, 0.1577                                                                  | 0.0559, 0.1884                                                                |
| CCDC Number                                                   | 790086                                                                          | 790085                                                                        |

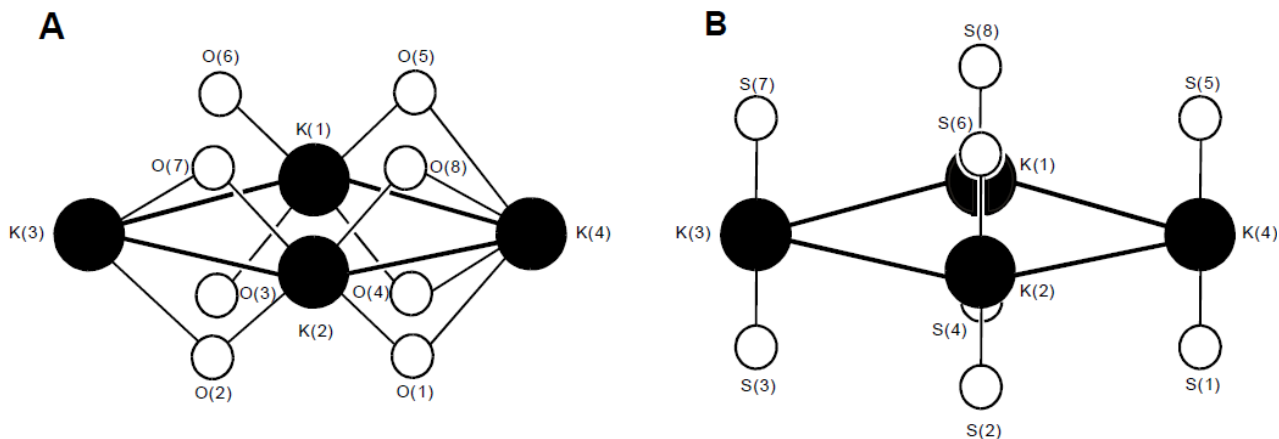

**Supplementary Figure S1** Coordination environments of the potassium cations in complex **2**: (A) K...O coordination between the potassium cations and the thiocalixarene phenolic/phenoxide oxygen atoms, (B) K...S coordination between the potassium cations and the thiocalixarene sulfur linker atoms. Selected bond lengths (Å) and angles (deg): K(1)···O(3) 2.718(4); K(1)···O(4) 2.710(6); K(1)···O(5) 2.748(4); K(1)···O(6) 2.712(5); K(2)···O(1) 2.438(4); K(2)···O(2) 2.414(4); K(2)···O(7) 2.426(4); K(2)···O(8) 2.389(4); K(3A)···O(2) 2.768(4); K(3A)···O(7) 2.770(4); K(3A)···O(9) 2.751(15); K(3B)···O(2) 2.746(6); K(3B)···O(7) 2.759(6); K(4A)···O(1) 2.812(4); K(4A)···O(8) 2.846(4); K(4B)···O(1) 2.764(6); K(4B)···O(8) 2.824(6); K(1)···S(4) 3.1975(16); K(1)···S(8) 3.2286(16); K(2)···S(2) 2.832(2); K(2)···S(6) 2.857(2); K(3A)···S(3) 3.283(2); K(3A)···S(7) 3.296(2); K(3B)···S(3) 3.231(5); K(3B)···S(7) 3.252(5); K(4A)···S(5) 3.219(3); K(4A)···S(1) 3.274(2); K(4B)···S(1) 3.272(5); K(4B)···S(5) 3.249(5); S(4)-K(1)-S(8) 125.15(5); S(2)-K(2)-S(6) 89.11(7); S(3)-K(3A)-S(7) 154.86(14); S(3)-K(3B)-S(7) 164.1(2); S(5)-K(4A)-S(1) 163.69(10); S(5)-K(4B)-S(1) 160.5(3).

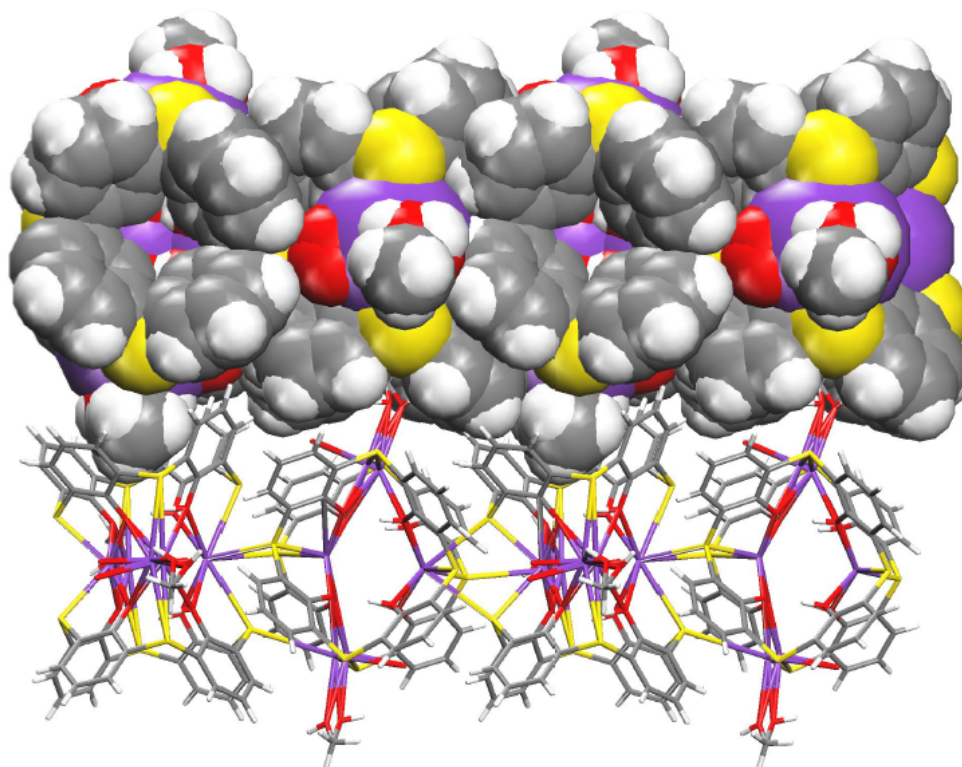

**Supplementary Figure S2** Extended structure of complex **2** showing the supramolecular assembly by the inclusion the coordinated methanol molecules of the polymer into the thiocalixarene cavities of the adjacent polymer (Stick and space-filling representation).

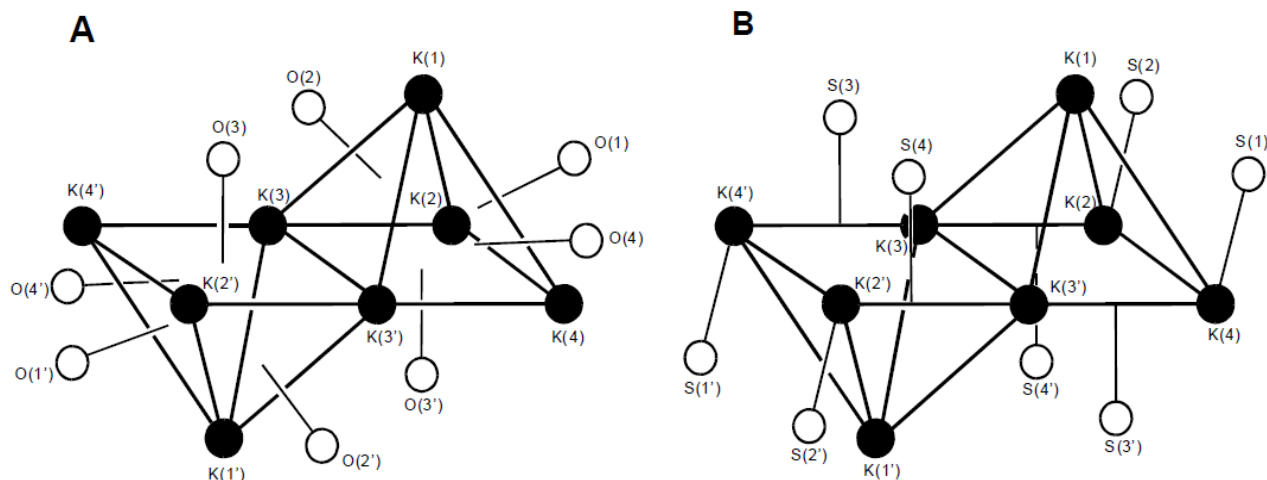

**Supplementary Figure S3** Coordination environments of the potassium cations in the distorted triangular pyramidal arrangements of complex **3**: (A) K $\cdots$ O coordination between the potassium cations and the thiocalixarene phenolic/phenoxide oxygen atoms, (B) K $\cdots$ S coordination between the potassium cations and the thiocalixarene sulfur linker atoms. Symmetry transformations used to generate equivalent atoms:  $x, -x+1, -y+2, -z$ . Selected bond lengths ( $\text{\AA}$ ) and angles (deg): K(1) $\cdots$ O(2) 2.689(2); K(1) $\cdots$ O(4) 2.670(2); K(2) $\cdots$ S(2) 3.1479(11); K(2) $\cdots$ S(4') 3.3381(11); K(2) $\cdots$ O(1) 2.673(2); K(2) $\cdots$ O(2) 2.748(2); K(2) $\cdots$ O(3') 2.823(2); K(3) $\cdots$ S(3) 2.9830(14); K(3) $\cdots$ S(4') 2.9377(16); K(3) $\cdots$ O(2) 2.330(2); K(3) $\cdots$ O(3) 2.394(2); K(3) $\cdots$ O(3') 2.441(2); K(3) $\cdots$ O(4') 2.327(2); K(4) $\cdots$ S(1) 3.1478(13); K(4) $\cdots$ S(3') 3.3168(11); K(4) $\cdots$ O(1) 2.755(2); K(4) $\cdots$ O(3') 2.971(2); K(4) $\cdots$ O(4) 2.676(2); K(3)-K(2)-K(4) 88.07(2); K(3')-K(3)-K(4') 96.84(4); K(2)-K(4)-K(3') 84.12(2)

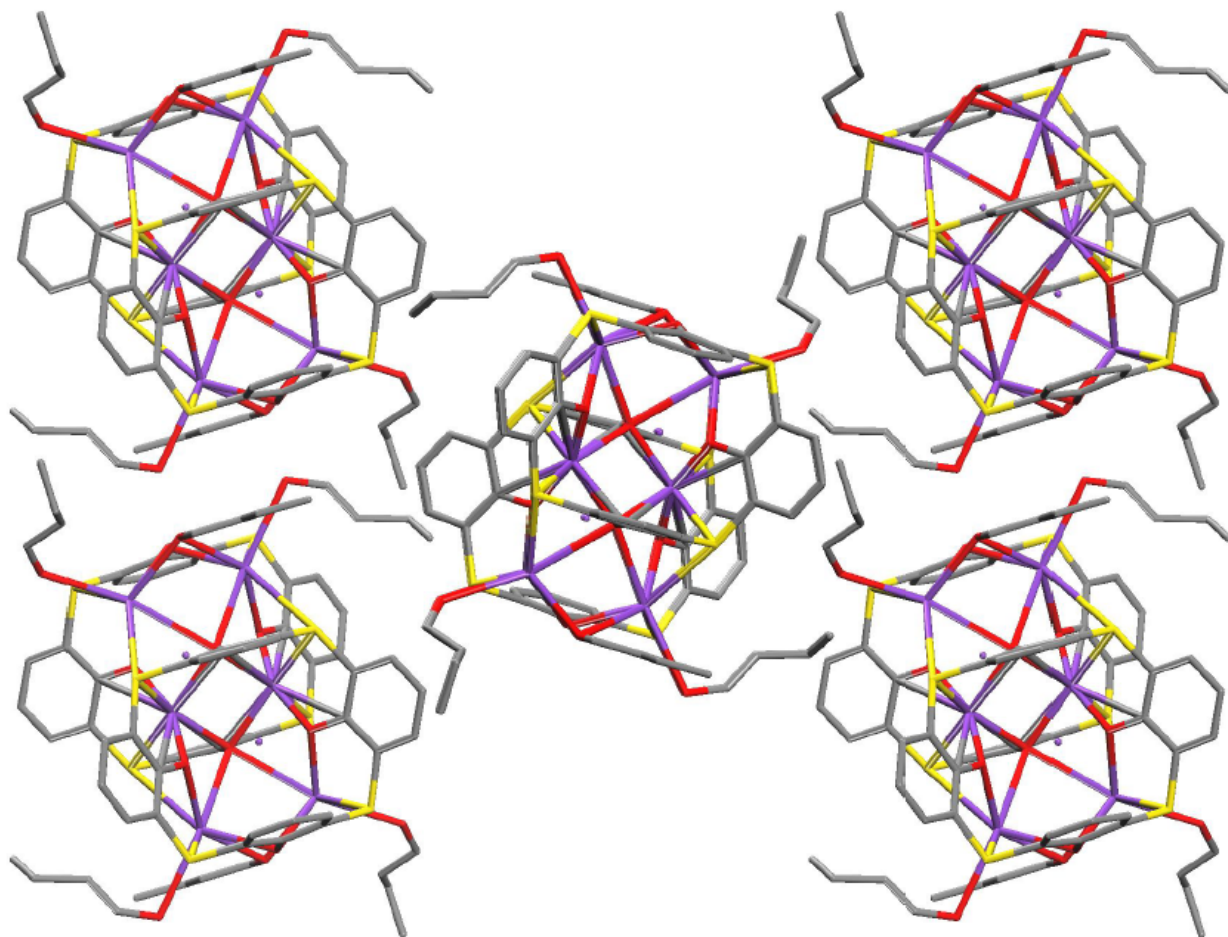

**Supplementary Figure S4** Extended structure of complex **3** showing the aggregation of the thiacalixarene aromatic rings and the solvated *n*-butanol molecules by intermolecular hydrophobic interactions.

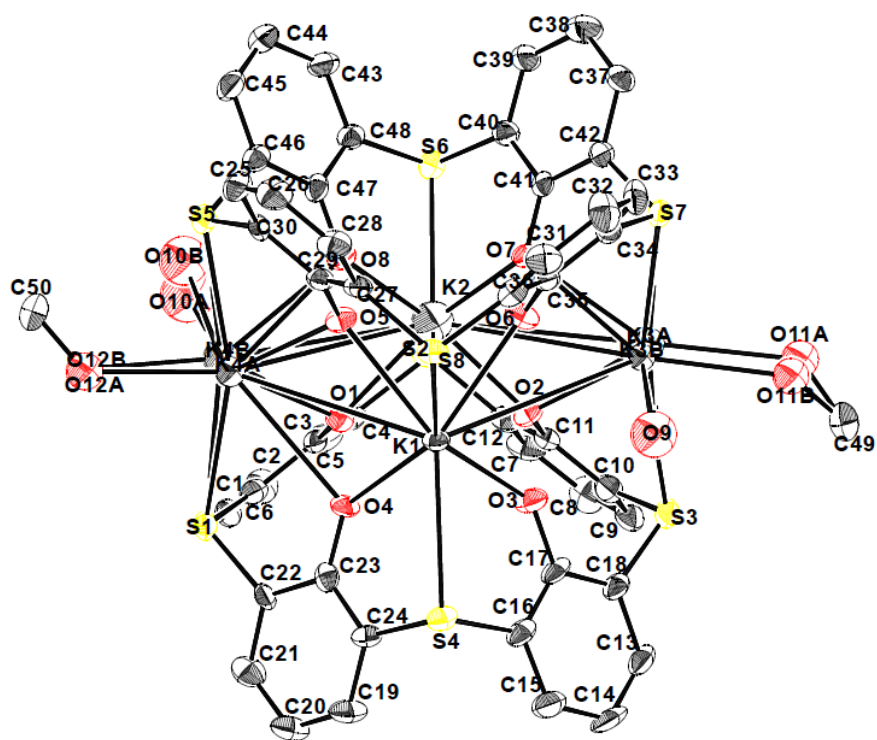

**Supplementary Figure S5** The ORTEP diagram of the asymmetric unit of complex **2** with thermal ellipsoids at 50% probability. Hydrogen atoms are omitted for clarity.

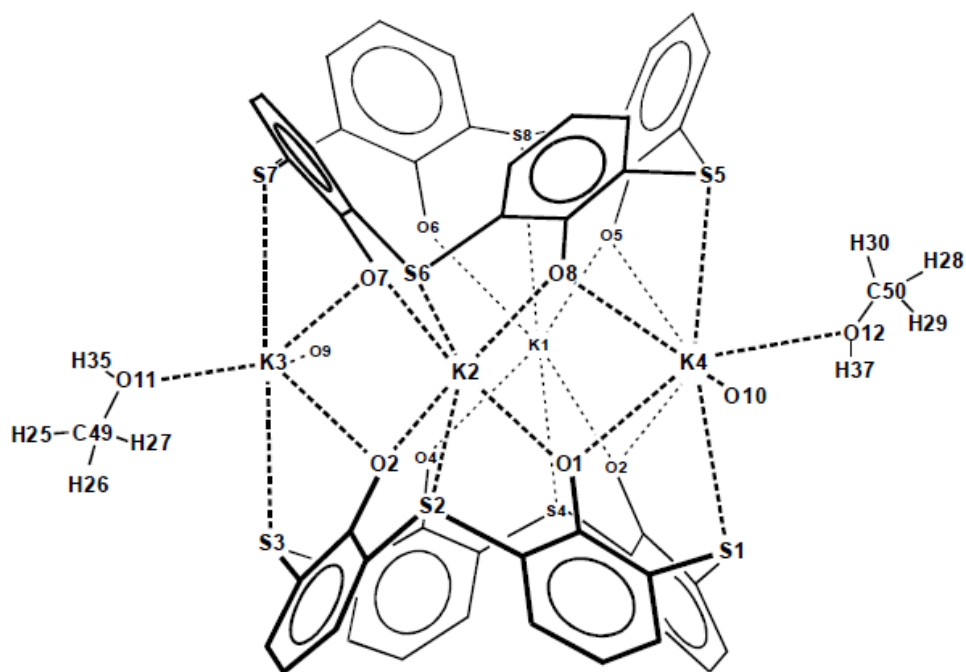

**Supplementary Figure S6** The diagram of coordination environments in complex **2** showing the relevant atom labeling scheme.



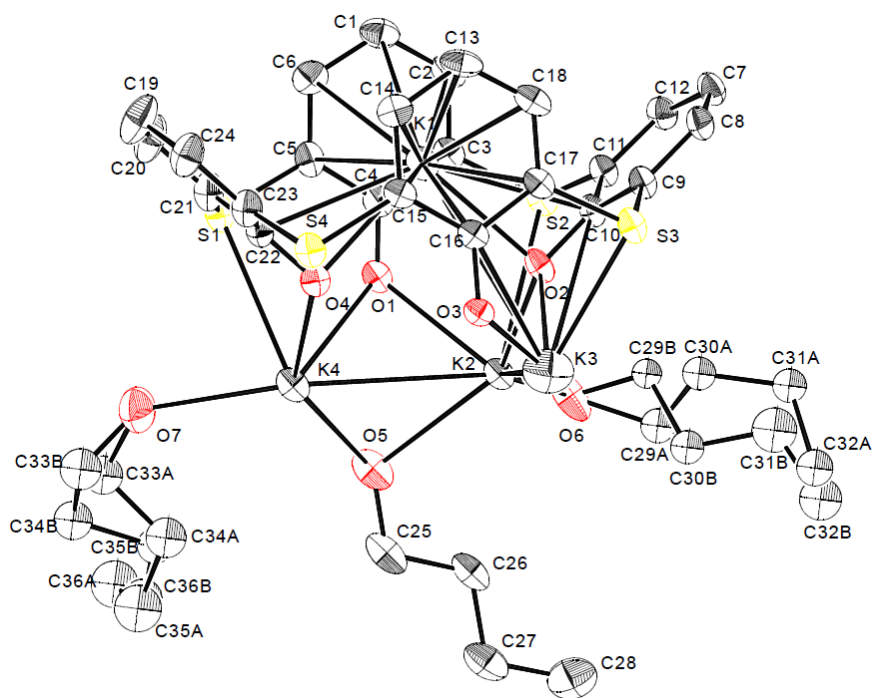

**Supplementary Figure S7** The ORTEP diagram of the asymmetric unit of complex **3** with thermal ellipsoids at 50% probability. Hydrogen atoms are omitted for clarity.

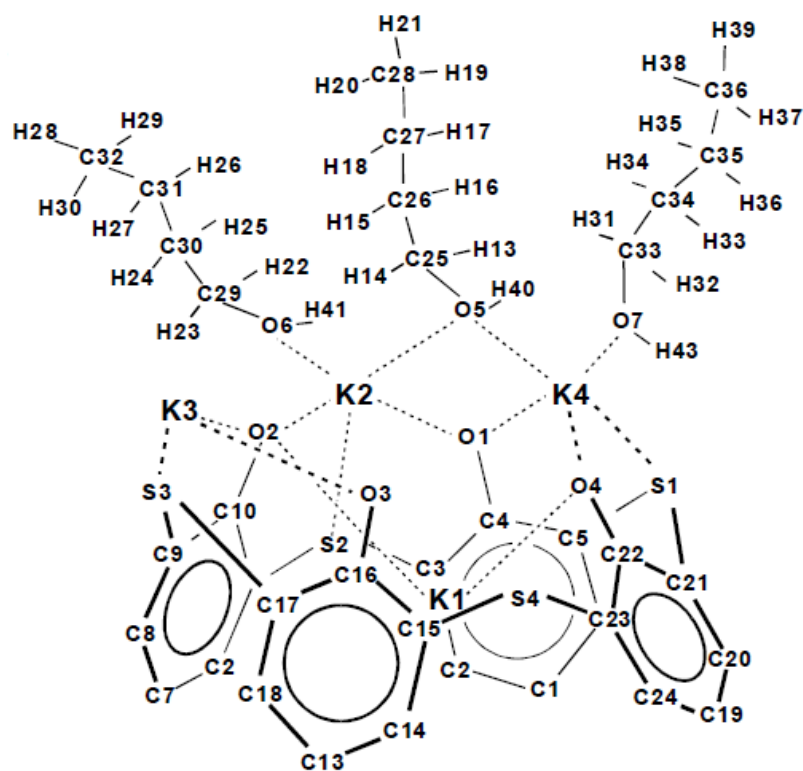

**Supplementary Figure S8** The diagram of coordination environments in complex **3** showing the relevant atom labeling scheme.
